# Supplementary material for: Remarkably stable gold nanoparticles functionalized with a zwitterionic liquid based on imidazolium sulfonate in a high concentration of aqueous electrolyte and ionic liquid
Source: Royal Society of Chemistry journal article supplement (doi:10.1039/b413385d), 2004-11-29
Supplement: b413385d.pdf [file b413385d.pdf]

## #ESI (Electronic Supplementary Information)

### Remarkably stable gold nanoparticles functionalized with zwitterionic liquid based on imidazolium-sulfonate in high concentration of aqueous electrolyte and ionic liquid

Ryouta Tatumi and Hisashi Fujihara\*

*Department of Applied Chemistry and Molecular Engineering Institute,*

*Kinki University, Kowakae, Higashi-Osaka 577-8502, Japan.*

*E-mail: h-fuji@apch.kindai.ac.jp*

A new disulfide **1** was synthesized by general methods as illustrated in Scheme 1. Imidazole was treated with sodium hydride in THF to form the anion which was reacted with Br-(CH<sub>2</sub>)<sub>10</sub>-S-S-(CH<sub>2</sub>)<sub>10</sub>-Br to yield **2**. Zwitter-disulfide **1** was prepared in 88% yield by reaction of **2** with 1,3-propanesultone in acetone at room temperature for 5 days. **1**: FT-IR 1652 cm<sup>-1</sup> (C=C), 1190 and 1043 cm<sup>-1</sup> (SO<sub>2</sub>); <sup>1</sup>H NMR (DMSO-*d*<sub>6</sub>) δ 9.19 (s, 2H, NCHN), 7.80-7.76 (m, 4H, NCHCHN), 4.30 (t, 4H, *J* = 7 Hz, NCH<sub>2</sub>), 4.14 (t, 4H, *J* = 7 Hz, NCH<sub>2</sub>), 2.67 (t, 4H, *J* = 7 Hz, CH<sub>2</sub>SO<sub>3</sub>), 2.41 (t, 4H, *J* = 7 Hz, CH<sub>2</sub>S), 2.09 (q, 4H, *J* = 7 Hz, CH<sub>2</sub>), 1.77 (q, 4H, *J* = 7 Hz, CH<sub>2</sub>), 1.58 (q, 4H, *J* = 7 Hz, CH<sub>2</sub>) and 1.34-1.23 (m, 24H, CH<sub>2</sub>); <sup>13</sup>C NMR (DMSO-*d*<sub>6</sub>) δ 136.0, 122.3, 122.2, 48.7, 47.8, 47.3, 37.8, 29.3, 28.8, 28.7, 28.5, 28.3, 27.7, 26.2, 25.5. MS (FAB), *m/z* 723 (MH<sup>+</sup>).

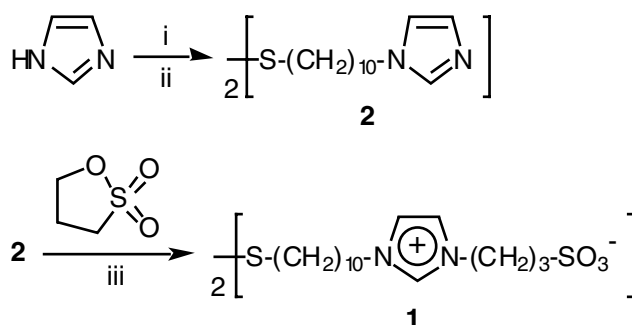

**Scheme 1.** i, NaH, THF, room temp., 1 h; ii, Br-(CH<sub>2</sub>)<sub>10</sub>-S-S-(CH<sub>2</sub>)<sub>10</sub>-Br; iii, acetone, room temp.
